# Supplementary material
Source: PubMed Central journal article supplement (PMC6393599)
Supplement: supp_RA118.006237_141277_2_supp_248284_pjhr0d.pdf [file supp_RA118.006237_141277_2_supp_248284_pjhr0d.pdf]

**Table S1: Strains and plasmids used in this study**

| Strain or plasmid     | Description                                                                                                                                                                                                                   | Source or Reference |
|-----------------------|-------------------------------------------------------------------------------------------------------------------------------------------------------------------------------------------------------------------------------|---------------------|
| <i>E. coli</i>        |                                                                                                                                                                                                                               |                     |
| DH10B                 | F <sup>-</sup> <i>mcrA</i> Δ( <i>mrr</i> - <i>hsdRMS</i> - <i>mcrBC</i> ) φ80 <i>dlacZ</i> ΔM15 Δ <i>lacX74</i> <i>deoR recA1 araD139</i> Δ( <i>ara leu</i> )7697 <i>galU galK rpsL endA1 nupG</i>                            | Invitrogen          |
| BL21 (DE3)            | F <sup>-</sup> <i>ompT gal dcm lon hsdS<sub>B</sub>(r<sub>B</sub><sup>-</sup>m<sub>B</sub><sup>-</sup>)</i> λ(DE3 [ <i>lacI lacUV5-T7p07 ind1 sam7 nin5</i> ]) [ <i>malB</i> <sup>+</sup> ] <sub>K-12</sub> (λ <sup>S</sup> ) | Invitrogen          |
| <i>M. smegmatis</i>   |                                                                                                                                                                                                                               |                     |
| mc <sup>2</sup> 155   | <i>ept-1</i> , efficient plasmid transformation mutant of mc <sup>2</sup> 6                                                                                                                                                   | (1)                 |
| Δ <i>fsq</i>          | mc <sup>2</sup> 155 Δ <i>fsq</i>                                                                                                                                                                                              | This study          |
| Δ6368                 | mc <sup>2</sup> 155 Δ <i>MSMEG_6368</i>                                                                                                                                                                                       | This study          |
| Δ <i>dosR</i>         | mc <sup>2</sup> 155 with marked deletion of <i>MSMEG_3944</i> , Hyg <sup>R</sup>                                                                                                                                              | (2)                 |
| Plasmids              |                                                                                                                                                                                                                               |                     |
| pX33                  | pPR23 carrying a constitutive <i>xyIE</i> marker; Gm <sup>+</sup>                                                                                                                                                             | (3)                 |
| pMind                 | Tetracycline inducible vector                                                                                                                                                                                                 | (4)                 |
| pJEM <i>hyd3-lacZ</i> | pJEM15 fused to promoter region of the Hyd3 operon                                                                                                                                                                            | (5)                 |
| pETMCSIII             | T7 inducible vector                                                                                                                                                                                                           | (6)                 |
| pETMCSIII-5243        | T7 inducible vector for <i>Fsq</i> expression His-tagged                                                                                                                                                                      | (7)                 |
| pLH1                  | pX33 containing flanking regions of <i>fsq</i> for deletion                                                                                                                                                                   | This study          |
| pLH2                  | pMind containing <i>fsq</i> gene with an artificial RBS                                                                                                                                                                       | This study          |
| pLH3                  | pX33 containing flanking regions of <i>MSMEG_6368</i> for deletion                                                                                                                                                            | This study          |

**Table S2: Primers used in this study.** Underlined text represents restriction enzyme recognition site used.

| Primer Name | Sequence 5' – 3'                         |
|-------------|------------------------------------------|
| LH1         | TTTT <u>ACTAGT</u> AAGGTCGCCGAGGAGCGCAA  |
| LH2         | CGTCGGCGGTGGTGGATCTGATCGCTCATGGAT        |
| LH3         | TCAGATCACCACCGCCGACGCCTCATGACC           |
| LH4         | AATT <u>ACTAGT</u> GGCAGGTTCCGGCAGCATCAC |
| LH5         | AATTGGATCCGGAGGAATAATGAGCGATCAGATCACCACG |
| LH6         | TTTT <u>ACTAGT</u> GTCGAGCACGGAGAGCTGTT  |
| LH7         | CGTAGGGGGGATCCACTAGTCCCGGCATCAGGTTGTGCTT |
| LH8         | GTGAAGAACCGCCCCGAGATCTCGTTCTCGCTGAGCACTG |
| LH9         | CAGTGCTCAGCGAGAACGAGATCTCGGGCGGTTCTTCAC  |
| LH10        | GCGGCCGCTCTAGAACTAGTCGGCTGGTACTTTCTGGTGT |
| LH11        | TGTCAGTGCTCAGCGAGAAC                     |
| LH12        | AACAGCACGCGATCACTCAT                     |
| LH13        | GTCGCACATCTTCCCGATCA                     |
| LH14        | ATGACGCTCCACCCCTGTTC                     |
| sigA fw     | GACTCTTCCTCGTCCCACAC                     |
| sigA rev    | GAAGACACCGACCTGGAAC                      |
| tgsfw       | GATGCTGGCCACCAATGT                       |
| tgsrev      | GCGTCGTAGTCGGAGATGAT                     |
| fsqCfw      | ACCGCGCTGATGTCCAAACT                     |
| fsqCrv      | GACGCAGTGGTGGATCTTGA                     |

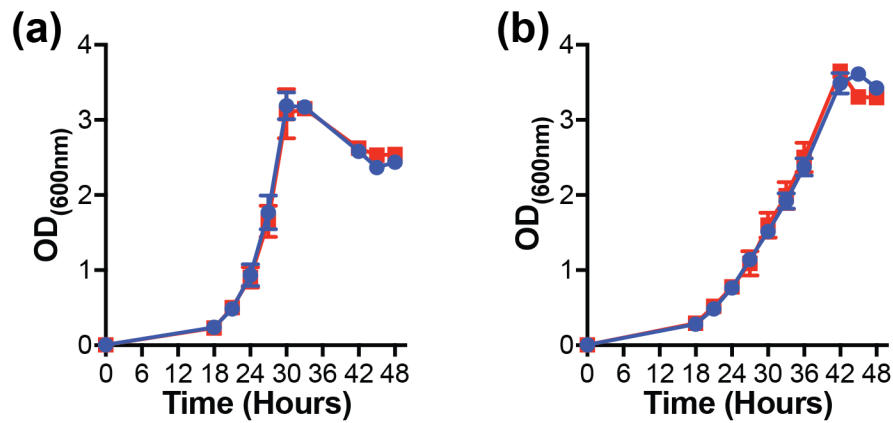

**Fig. S1. Growth of *M. smegmatis* wild type (WT) compared to  $\Delta fsq$  mutant under aerobic conditions.** (a) Growth on HdB with 22 mM glycerol as the sole carbon and energy source. Average optical density of three biological replicates shown with standard deviation. (b) Growth on HdB with 30 mM succinate as the sole carbon and energy source. Average optical density of three biological replicates shown with error bars representing standard deviation.

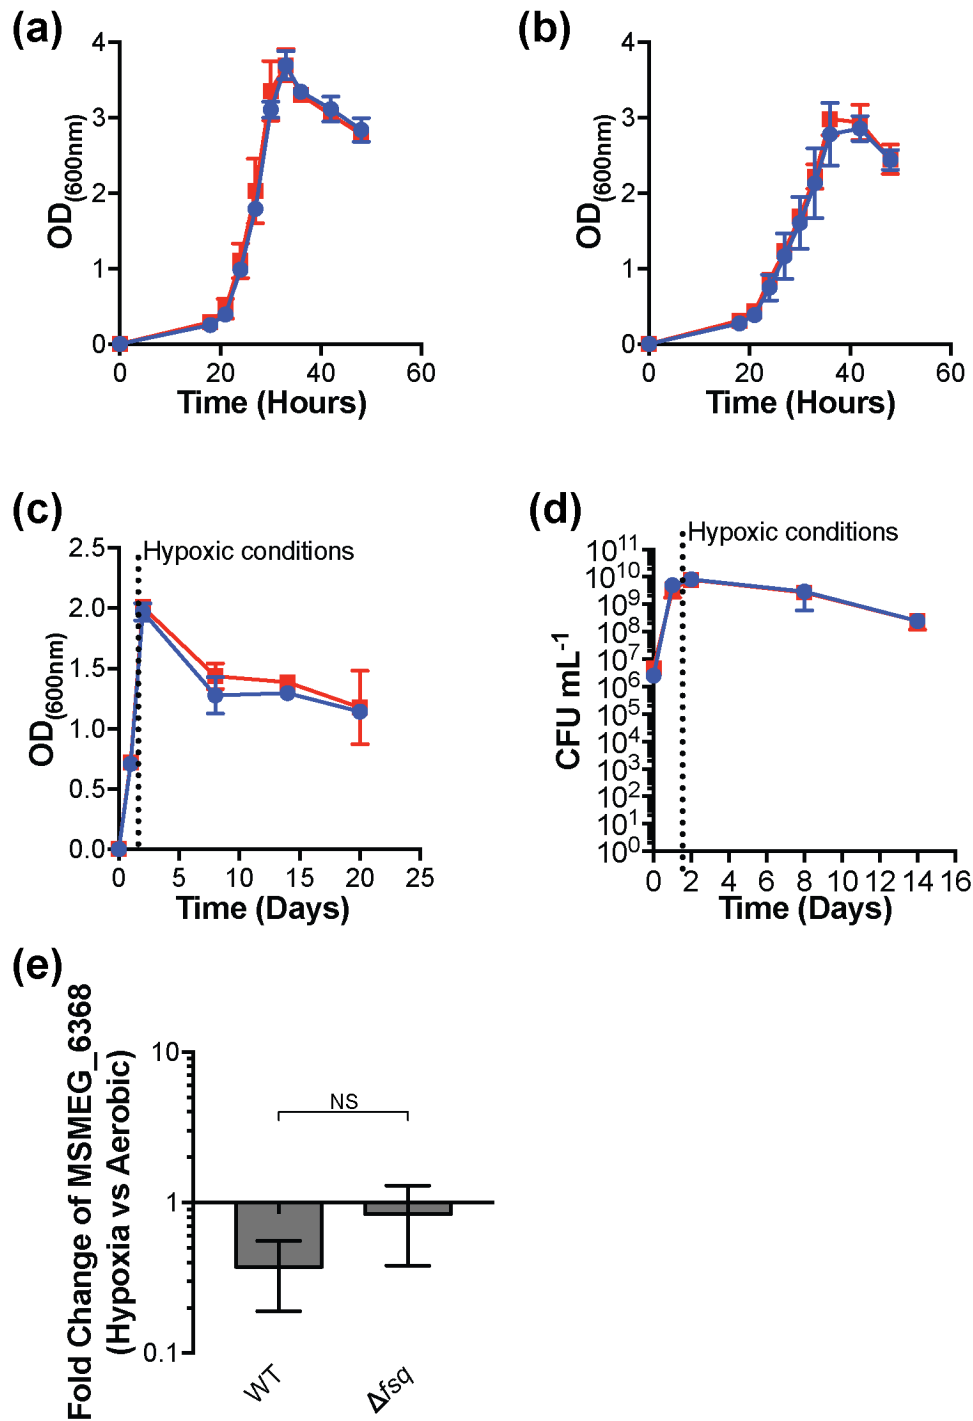

**Fig. S2. MSMEG\_6368 does not affect growth of *M. smegmatis*.** Wild type (WT) blue circles,  $\Delta 6368$  mutant red squares (a) Growth on HdB aerobically with 22 mM glycerol as the sole carbon and energy source. Average optical density of three biological replicates with error bars representing standard deviation. (b) Growth on HdB aerobically with 30 mM succinate as the sole carbon and energy source. Average of three biological replicates with error bars representing standard deviation. (c) Growth following entry into hypoxia measured by optical density. Average of three biological replicates with error bars representing standard deviation. (d) Survival following entry into hypoxia measured by colony forming units on agar plates. Average of three biological replicates with error bars representing standard deviation. (e) Comparison of expression ratio of *MSMEG\_6368* in wild-type and  $\Delta fsq$  mutant genetic backgrounds from cells harvested at 6 days growth in aerobic and hypoxic conditions. *SigA* was used as the reference gene. Error bars represent standard deviation of biological triplicate. Unpaired students t test. NS= $p < 0.05$ .

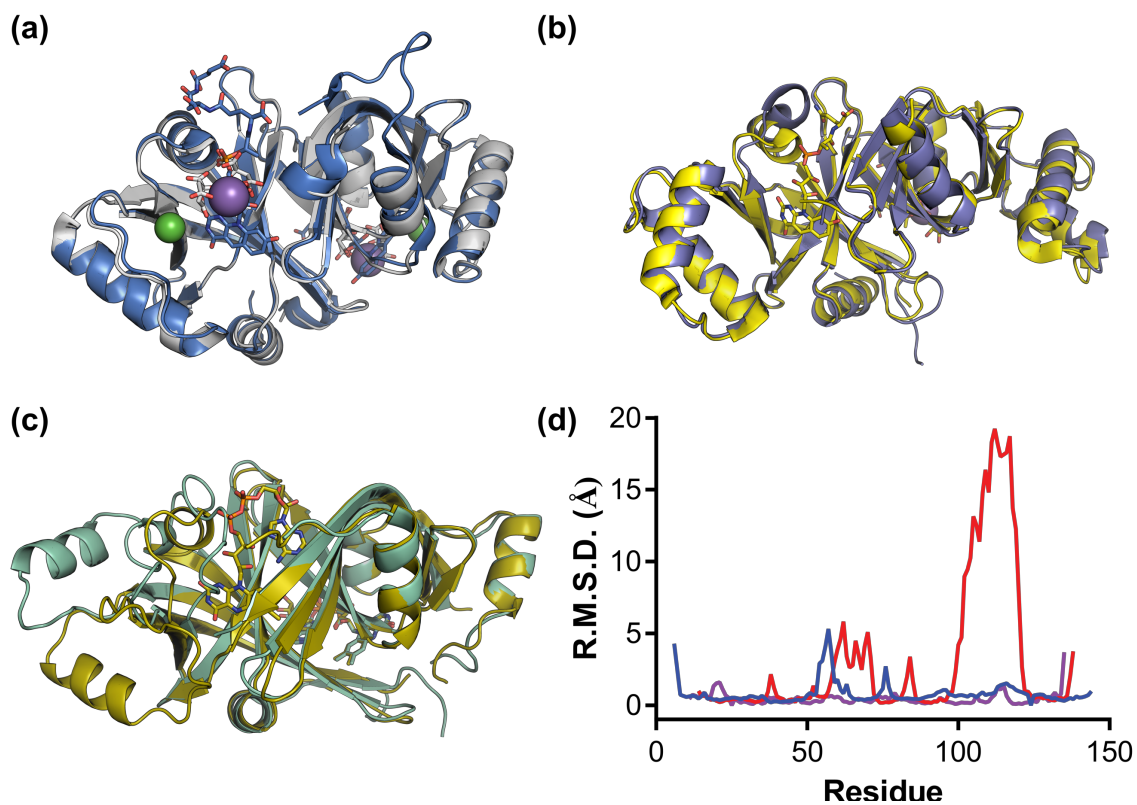

**Fig. S3. Comparison of structural changes induced by cofactor binding between members of the FDOR superfamily** (a) Overlay of rv2074 complexed with citrate (2ASF, white) and complexed with F<sub>420</sub> (5JAB, blue). (b) Overlay of rv1155 apo structure (1W9A, purple) and complexed with F<sub>420</sub> (4QVB, yellow). (c) Overlay of MSMEG\_5243 partially complexed with FAD (OP dimer, light green) and fully complexed with FAD (AB dimer, gold). (d) R.M.S.D. of backbone residues between apo and holo complexes of rv2074 (purple), rv1155 (blue) and MSMEG\_5243 (red).

## Supplementary references

1. Snapper SB, Melton RE, Mustafa S, Kieser T, Jacobs WR, Jr. 1990. Isolation and characterization of efficient plasmid transformation mutants of *Mycobacterium smegmatis*. *Mol Microbiol* 4:1911-9.
2. O'Toole R, Smeulders MJ, Blokpoel MC, Kay EJ, Lougheed K, Williams HD. 2003. A two-component regulator of universal stress protein expression and adaptation to oxygen starvation in *Mycobacterium smegmatis*. *J Bacteriol* 185:1543-54.
3. Gebhard S, Tran SL, Cook GM. 2006. The Phn system of *Mycobacterium smegmatis*: a second high-affinity ABC-transporter for phosphate. *Microbiology* 152:3453-65.
4. Blokpoel MC, Murphy HN, O'Toole R, Wiles S, Runn ES, Stewart GR, Young DB, Robertson BD. 2005. Tetracycline-inducible gene regulation in mycobacteria. *Nucleic Acids Res* 33:e22.
5. Berney M, Greening C, Hards K, Collins D, Cook GM. 2014. Three different [NiFe] hydrogenases confer metabolic flexibility in the obligate aerobe *Mycobacterium smegmatis*. *Environ Microbiol* 16:318-30.
6. Neylon C, Brown SE, Kralicek AV, Miles CS, Love CA, Dixon NE. 2000. Interaction of the *Escherichia coli* Replication Terminator Protein (Tus) with DNA: A Model Derived from DNA-Binding Studies of Mutant Proteins by Surface Plasmon Resonance†. *Biochemistry* 39:11989-11999.
7. Ahmed FH, Carr PD, Lee BM, Afriat-Jurnou L, Mohamed AE, Hong NS, Flanagan J, Taylor MC, Greening C, Jackson CJ. 2015. Sequence-Structure-Function Classification of a Catalytically Diverse Oxidoreductase Superfamily in Mycobacteria. *J Mol Biol* 427:3554-3571.
